# Supplementary material for: Sleep and breathing in premature infants at 6 months post-natal age
Source: PubMed Central journal article supplement (PMC4272529; doi:10.1186/s12887-014-0303-6), 2014-12-16
Supplement: 12887_2014_303_MOESM1_ESM.pdf [file 12887_2014_303_MOESM1_ESM.pdf]

# 中文版嬰幼兒睡眠問卷(CBISQ)

填寫問卷人姓名: \_\_\_\_\_ 日期: \_\_\_\_\_ 年 \_\_\_\_\_ 月 \_\_\_\_\_ 日  
填寫問卷人關係: 父親 母親 祖父母 其他  
兒童姓名: \_\_\_\_\_ 病歷號: \_\_\_\_\_ 生日: \_\_\_\_\_ 年 \_\_\_\_\_ 月 \_\_\_\_\_ 日  
性別: 男 女 家中排行: 老大 中間 老么

請單選一項最適合的敘述 (關於你的小孩過去一週的睡覺狀況)

## 1.睡眠環境:

- 睡在單獨房間的嬰兒床 睡在跟父母同房間的嬰兒床  
睡在父母的床上 睡在跟兄弟姐妹同房間的嬰兒床  
其他

## 2.你的小孩最常睡覺的姿勢:

- 趴睡 側睡 仰睡

## 3.你的小孩夜間睡眠時間是多少?(晚上七點到早上七點之間)

\_\_\_\_\_小時 \_\_\_\_\_分鐘

## 4.你的小孩白天睡眠時間是多少?(早上七點到晚上七點之間)

\_\_\_\_\_小時 \_\_\_\_\_分鐘

## 5.平均晚上醒來次數: \_\_\_\_\_

## 6.你的小孩在夜間醒來的時間有多長?(晚上十點到早上六點間)

\_\_\_\_\_小時 \_\_\_\_\_分鐘

## 7.晚上你需要花多久時間讓小孩入睡?

\_\_\_\_\_小時 \_\_\_\_\_分鐘

## 8.什麼情況下你的小孩會入睡?

- 餵食時 搖他 抱著  
單獨在床上 有父母陪在床上

## 9.你的小孩晚上通常幾點睡?

\_\_\_\_\_時 \_\_\_\_\_分

## 10.你認為你小孩的睡眠是個問題嗎?

- 非常嚴重 一點點 完全不是問題

## 11.你的小孩睡覺的時候是張開嘴巴睡覺嗎?

- 非常嚴重 一點點 完全沒有

## 12.你的小孩睡覺的時候呼吸聲很大嗎?

- 非常嚴重 一點點 完全沒有

## 13.你的小孩晚上睡覺常常哭鬧嗎?

- 非常嚴重 一點點 完全沒有
